# Supplementary material
Source: PubMed Central journal article supplement (PMC9211390)
Supplement: aac.00206-22-s0001.pdf [file aac.00206-22-s0001.pdf]

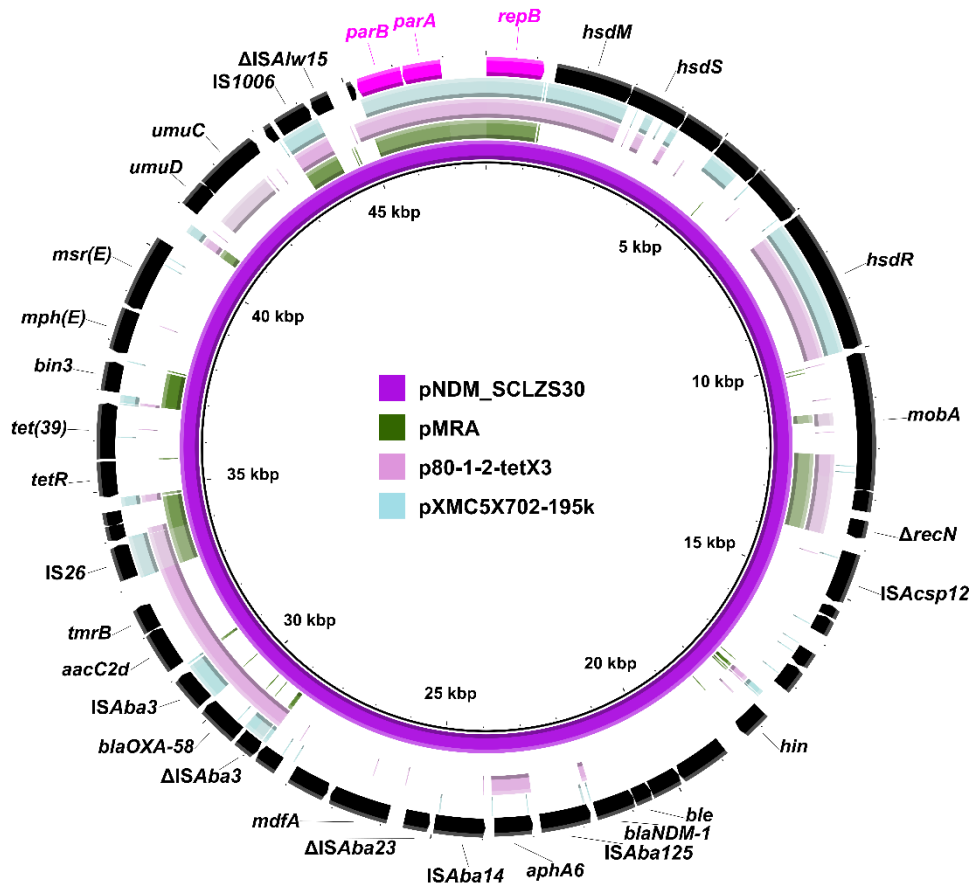

**Figure S1** Sequence comparison of pNDM\_SCLZS30 with other GR59 plasmids. pNDM\_SCLZS30 was used as a reference, and its gene annotations are indicated by black arrows in the outer circle. *parAB* and *repB* are highlighted in pink. Gaps indicate regions that are missing in the respective plasmid when compared to the reference plasmid.

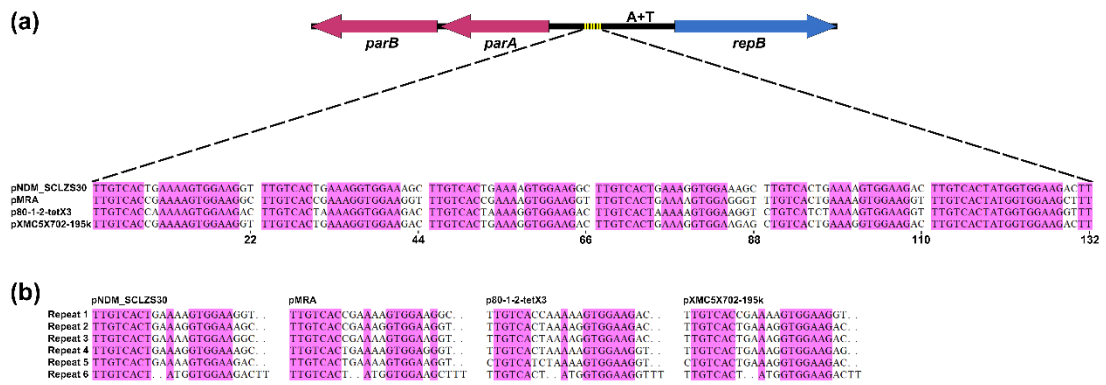

**Figure S2** Characterization of the conserved region of GR59 plasmids. (a) Comparison of the different repeats between plasmids. *parAB* and *repB* are indicated by red and blue arrows. Yellow vertical bars indicate tandem repeats, and ‘A+T’ represents the AT-rich region. (b) Comparison of the repeats in different plasmids. Identical nucleotide sequences are indicated by pink shading.
